# Supplementary material for: Multi-Omics Analysis of Anlotinib in Pancreatic Cancer and Development of an Anlotinib-Related Prognostic Signature
Source: Front Cell Dev Biol. 2021 Mar 4;9:649265. doi: 10.3389/fcell.2021.649265 (PMC7969999; doi:10.3389/fcell.2021.649265)
Supplement: Supplementary file 2 [file Data_Sheet_2.xlsx]

## Sheet: Table S1
Supplemental Table 1 Primers used in this study
Names	Forward/Sense	Reverse-primer/Anti-sense
GAPDH-qPCR	TGACTTCAACAGCGACACCCA	CACCCTGTTGCTGTAGCCAAA
EGFR-qPCR	AGGCACGAGTAACAAGCTCAC	ATGAGGACATAACCAGCCACC
ICAM1-qPCR	CAAGAAGATAGCCAACCAATG	GCCAGTTCCACCCGTTC
CD82-qPCR	GCCTGTATCAAAGTCACCAAA	CAGGAGCAGGAAAGCAAAG
SNAI2-qPCR	CAAGGACACATTAGAACTCACAC	CTACACAGCAGCCAGATTCC
TGFBR1-qPCR	CACAGAGTGGGAACAAAAAGGT	CCAATGGAACATCGTCGAGCA
MMP1-qPCR	CTCTGGAGTAATGTCACACCTCT	TGTTGGTCCACCTTTCATCTTC
PLAUR-qPCR	CCTGAGCTATCGGACTGGC	AGGTAACGGCTTCGGGAAT
HMOX1-qPCR	AAGACTGCGTTCCTGCTCAAC	AAAGCCCTACAGCAACTGTCG
CAPN2-qPCR	GAGAAGGGTTCTAGCAAAGCG	CAAACCGAGCAACGATGACT
HBEGF-qPCR	AGGAGGAGCACGGGAAAAGA	AGAAGCCCCACGATGACCAG
ETS1-qPCR	CCGCTATACCTCGGATTACTT	TGGGGTGACGACTTCTTGTT
SPHK1-qPCR	CTATGAGCAGGTCACCAATG	GACGCCGATACTTCTCACTC
FOS-qPCR	GGGGCAAGGTGGAACAGTTAT	CCGCTTGGAGTGTATCAGTCA
CTSL-qPCR	AAACTGGGAGGCTTATCTCACT	GCATAATCCATTAGGCCACCAT
CXCL2-qPCR	CCAAACCGAAGTCATAGC	GAACAGCCACCAATAAGC
COL9A3-qPCR	ATCTGCGACACCTCAGCC	TGACCGTCCACTGTGCTT
NREP-qPCR	GTTGAGCGAATGCTACCAGAG	AGGCGAGGCTACGGAAAG
MND1-qPCR	TGTGAGAGGATCGGAACTTCT	CACATCGGCCAATTTTAGCTTTC
WWC3-qPCR	CTTCCCTCACCATGTAGGCG	CAAAGACAAACTCCCCGATGATA
RDM1-qPCR	GCCCATCCTGGTTTCTATGCC	AGACGAACCTTGACTGGAGAT
CORO2A-qPCR	ATCCTCTTCAGTGCTGGCTAT	TAACCCGAATCTTGCGGTCTT
PPP1R3C-qPCR	GGTGGCACAGATAGTGATACCT	ACCATCATTGTTGTCCCAAAAGA
FLRT2-qPCR	CGCTGCGACAGGAACTTTG	TGGAGGTAGAGTACGGTTACG
SIAE-qPCR	CTGCACTCATCGAAGACTGGC	GTATTGGGCATCTTTGGGTTGG
CAPN11-qPCR	GCGGAGCCCACTTTTACTGAT	GCCAGGAGATGTTCTGCACA
H4C3-qPCR	GCAAAGGCGGAAAAGGCTTG	TAGCCGGTTTTGTAATGCCCT
VWA1-qPCR	GCGTCACCGTGTTCATTGTC	AGGTCATCCACGTCCACAAA
RNASE4-qPCR	GAGGAGACAGGTGGCAGTGAT	CTTGCATTGGATATTGGTGGT
SLITRK6-qPCR	TCTGGGCTTACCAATGCTATTTC	TGAGTCTGTTGAGCTTGCTAAAG
RAB26-qPCR	AGGAGCGGTTCCGCAGTGTTA	TACTCGTGGATCTCGGTCAGC
ATM-qPCR	CAGGGTAGTTTAGTTGAGGTTGACAG	CTATACTGGTGGTCAGTGCCAAAGT
SFN-qPCR	TCCACTACGAGATCGCCAACAG	GTGTCAGGTTGTCTCGCAGCA
GADD45A-qPCR	TCGTGAAATGGAAGGGATGG	AGGTTTTGGGCTTGGGTC
CDC25C-qPCR	ATGACAATGGAAACTTGGTGGAC	GGAGCGATATAGGCCACTTCTG
CKS1B-qPCR	TATTCGGACAAATACGACGACG	CGCCAAGATTCCTCCATTCAGA
PRKDC-qPCR	AGAAGGCGGCTTACCTGAG	CTGACATTTTTGTCAGCCAATC
PLK1-qPCR	CGAGGGTGATGAGAACCTGC	CCCATGTGATTCGATGCGT
CDK1-qPCR	AAACTACAGGTCAAGTGGTAGCC	TCCTGCATAAGCACATCCTGA
TOP2A-qPCR	CACCTAAGCTGCACAGTTCC	GGCTGCCTCCTAATTCTTCC

## Sheet: Table S2
Supplementary table 2. transciptomics results of 30 randomly selected genes
Gene Symbol	Fold Change	logFC	P-value	FDR	Regulation
COL9A3	-2.54151	-1.34568	1.47e-09	1.15e-08	Down
NREP	-2.67534	-1.41972	2.1e-13	6.92e-12	Down
MND1	-2.87318	-1.52265	6.16e-14	2.59e-12	Down
WWC3	-2.78034	-1.47526	2.29e-14	1.2e-12	Down
RDM1	-3.103	-1.63366	1.27e-10	1.38e-09	Down
CORO2A	-2.7711	-1.47046	3.78e-12	7.34e-11	Down
PPP1R3C	-2.78566	-1.47802	3.31e-16	5.2e-14	Down
FLRT2	-2.68541	-1.42514	6.95e-16	9.14e-14	Down
SIAE	-2.67303	-1.41847	3.45e-13	1.04e-11	Down
CAPN11	-3.41004	-1.76979	2.69e-14	1.35e-12	Down
H4C3	-2.60371	-1.38057	1.53e-19	1.58e-16	Down
VWA1	-4.05588	-2.02002	3.28e-15	2.76e-13	Down
RNASE4	-2.61039	-1.38427	1.17e-12	2.77e-11	Down
SLITRK6	-2.96243	-1.56678	9.71e-16	1.14e-13	Down
RAB26	-2.76948	-1.46961	3.26e-16	5.16e-14	Down
FOS	2.73837	1.45332	1.2657e-09	1.01285e-08	Up
ETS1	5.52731	2.46658	2.67817e-17	7.83844e-15	Up
CXCL2	2.07189	1.05095	8.28883e-13	2.10408e-11	Up
ICAM1	2.39758	1.26158	5.805e-16	8.07039e-14	Up
CTSL	2.54242	1.3462	1.50907e-16	2.8454e-14	Up
HMOX1	8.28742	3.05092	1.51045e-19	1.58285e-16	Up
MMP1	20.6439	4.36765	1.00636e-15	1.15743e-13	Up
SPHK1	2.74357	1.45605	7.6759e-13	1.97793e-11	Up
SNAI2	2.28164	1.19007	4.52789e-07	1.89176e-06	Up
EGFR	2.03621	1.02588	1.31126e-11	2.03749e-10	Up
HBEGF	3.40405	1.76725	1.02583e-11	1.66267e-10	Up
CAPN2	2.63668	1.39872	6.21339e-18	2.73801e-15	Up
PLAUR	2.20919	1.14352	1.56895e-12	3.54043e-11	Up
CD82	2.45782	1.29738	2.66951e-13	8.44318e-12	Up
TGFBR1	2.09906	1.06974	1.02203e-06	3.95102e-06	Up

## Sheet: Table S3
Supplementary table 3. Univariate Cox analysis of anlotinib-regulated genes in the TCGA_PAAD and GSE62452 datasets.
	TCGA_PAAD				GSE62452
Gene.Symbol	beta	HR (95% CI for HR)	wald.test	p.value	beta	HR (95% CI for HR)	wald.test	p.value
AFAP1	0.39	1.5 (1.1-1.9)	7.4	0.0065	0.73	2.1 (1-4.2)	4.3	0.038
ARF6	0.76	2.1 (1.4-3.2)	14	0.00019	1.4	4.3 (1.3-14)	6	0.015
ASF1B	0.49	1.6 (1.3-2.1)	16	8.2e-05	1.5	4.4 (1.7-11)	9.2	0.0025
AURKB	0.31	1.4 (1.1-1.6)	9.8	0.0018	1.1	2.9 (1.1-7.9)	4.4	0.037
BUB1	0.58	1.8 (1.4-2.3)	18	2.3e-05	0.68	2 (1.3-3.1)	9.3	0.0023
CCNA2	0.53	1.7 (1.3-2.2)	16	8.1e-05	0.64	1.9 (1.1-3.3)	5.3	0.021
CDK1	0.59	1.8 (1.4-2.4)	20	9.1e-06	0.48	1.6 (1.1-2.4)	5.6	0.018
CRABP2	0.18	1.2 (1.1-1.3)	10	0.0014	0.44	1.6 (1.1-2.2)	6.2	0.013
FAM83D	0.25	1.3 (1.1-1.5)	13	0.00038	0.41	1.5 (1.1-2.1)	6.8	0.0091
KIF11	0.62	1.9 (1.4-2.5)	18	2.2e-05	0.56	1.7 (1.1-2.8)	5.5	0.019
KIF2C	0.41	1.5 (1.2-1.9)	14	0.00017	0.87	2.4 (1.4-4.1)	10	0.0014
LMNB1	0.52	1.7 (1.3-2.2)	13	0.00024	0.63	1.9 (1.1-3.3)	5	0.026
MCM6	0.44	1.5 (1.1-2.1)	7.4	0.0066	0.7	2 (1-3.9)	4.4	0.035
MELK	0.38	1.5 (1.2-1.8)	14	0.00017	0.44	1.6 (1.1-2.2)	5.6	0.018
NCAPH	0.49	1.6 (1.3-2.1)	15	9.4e-05	1.1	2.9 (1.5-5.7)	9.4	0.0022
NEK2	0.44	1.6 (1.2-1.9)	15	9e-05	0.54	1.7 (1.1-2.7)	5.6	0.018
NRM	0.4	1.5 (1.1-2.1)	6.2	0.013	1.9	7 (2.2-22)	11	0.0009
NUSAP1	0.61	1.8 (1.4-2.4)	20	7.4e-06	0.65	1.9 (1.1-3.3)	5.4	0.021
PCLAF	0.45	1.6 (1.2-2)	15	0.00013	0.5	1.7 (1.1-2.6)	5.1	0.025
PERP	0.47	1.6 (1.3-2)	16	7.8e-05	0.64	1.9 (1-3.4)	4.5	0.035
PLK1	0.44	1.5 (1.2-2)	14	0.00022	0.98	2.7 (1.5-4.7)	12	0.00054
PRC1	0.55	1.7 (1.3-2.2)	18	1.9e-05	0.91	2.5 (1.4-4.3)	11	0.0011
PRDM1	0.28	1.3 (1-1.7)	5.2	0.022	0.49	1.6 (1.1-2.5)	4.9	0.027
PRKDC	0.39	1.5 (1.1-2)	5.5	0.019	1.1	3.1 (1.3-7.8)	6	0.014
SOX4	0.39	1.5 (1.2-1.9)	9.9	0.0017	1	2.8 (1.1-7)	5	0.025
TOP2A	0.49	1.6 (1.3-2)	18	1.9e-05	0.4	1.5 (1.1-2)	6.2	0.012
TTK	0.52	1.7 (1.3-2.1)	17	3.8e-05	0.6	1.8 (1.2-2.9)	6.8	0.0089
UBE2C	0.31	1.4 (1.2-1.6)	14	0.0002	0.85	2.3 (1.5-3.7)	14	0.00016

## Sheet: Table S4
Supplementary table 4. GSEA results between the high- and low-risk subgroups of the TCGA_PAAD cohort.
NAME	NES	NOM p-val	FDR q-val
KEGG_NUCLEOTIDE_EXCISION_REPAIR	1.92314	0	0.125265
KEGG_CELL_CYCLE	1.90634	0	0.0693614
KEGG_SPLICEOSOME	1.90449	0.00206186	0.0481982
KEGG_MISMATCH_REPAIR	1.88085	0	0.0466489
KEGG_DNA_REPLICATION	1.8748	0	0.0429245
KEGG_P53_SIGNALING_PATHWAY	1.87421	0	0.0357704
KEGG_HOMOLOGOUS_RECOMBINATION	1.86629	0	0.0350143
KEGG_RNA_DEGRADATION	1.8438	0.0019802	0.0382555
KEGG_PYRIMIDINE_METABOLISM	1.79678	0.002	0.0523849
KEGG_AMINOACYL_TRNA_BIOSYNTHESIS	1.78423	0.0121457	0.0554401
KEGG_OOCYTE_MEIOSIS	1.78421	0	0.0504
KEGG_BASE_EXCISION_REPAIR	1.78359	0.00411523	0.0465753
KEGG_BASAL_TRANSCRIPTION_FACTORS	1.75993	0	0.0581684
KEGG_PROTEASOME	1.74501	0.0206379	0.0614929
KEGG_HUNTINGTONS_DISEASE	1.73182	0.0334646	0.0650151
KEGG_PENTOSE_PHOSPHATE_PATHWAY	1.72191	0.0130354	0.0669506
KEGG_UBIQUITIN_MEDIATED_PROTEOLYSIS	1.68781	0.00814664	0.0869166
KEGG_RIG_I_LIKE_RECEPTOR_SIGNALING_PATHWAY	1.66266	0	0.106061
KEGG_GALACTOSE_METABOLISM	1.6482	0.0213178	0.116491
KEGG_GLYCOSPHINGOLIPID_BIOSYNTHESIS_LACTO_AND_NEOLACTO_SERIES	1.63848	0.00967118	0.122501
KEGG_SMALL_CELL_LUNG_CANCER	1.63831	0.019084	0.116709
KEGG_STEROID_BIOSYNTHESIS	1.61337	0.036	0.132649
KEGG_SYSTEMIC_LUPUS_ERYTHEMATOSUS	1.59128	0.035514	0.15407
KEGG_ONE_CARBON_POOL_BY_FOLATE	1.58406	0.015873	0.155105
KEGG_BLADDER_CANCER	1.58097	0.032381	0.153235
KEGG_THYROID_CANCER	1.57106	0.0287356	0.15797
KEGG_N_GLYCAN_BIOSYNTHESIS	1.55391	0.0394477	0.172594
KEGG_GLYCOSAMINOGLYCAN_BIOSYNTHESIS_KERATAN_SULFATE	1.54769	0.0330882	0.17511
KEGG_FRUCTOSE_AND_MANNOSE_METABOLISM	1.54038	0.0477099	0.178976
KEGG_PATHOGENIC_ESCHERICHIA_COLI_INFECTION	1.53492	0.0315399	0.178711
KEGG_PANCREATIC_CANCER	1.52783	0.0466926	0.170102
KEGG_PROGESTERONE_MEDIATED_OOCYTE_MATURATION	1.52524	0.0238569	0.168152
KEGG_AXON_GUIDANCE	1.5186	0.0394737	0.171584
